# Supplementary material
Source: publisher figshare collection journal article supplement (https://acs.figshare.com/ndownloader/files/4768147)

**Supporting Information-2 (NMR spectra II) for:**

**Total Synthesis of Agelagalastatin**

Yong Joo Lee, Bo-Young Lee, Heung Bae Jeon, and Kwan Soo Kim\*

*Center for Bioactive Molecular Hybrids and Department of Chemistry,  
Yonsei University, Seoul 120-749, Korea.*

[kwon@yonsei.ac.kr](mailto:kwon@yonsei.ac.kr)

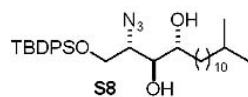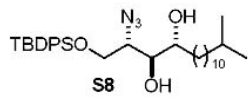



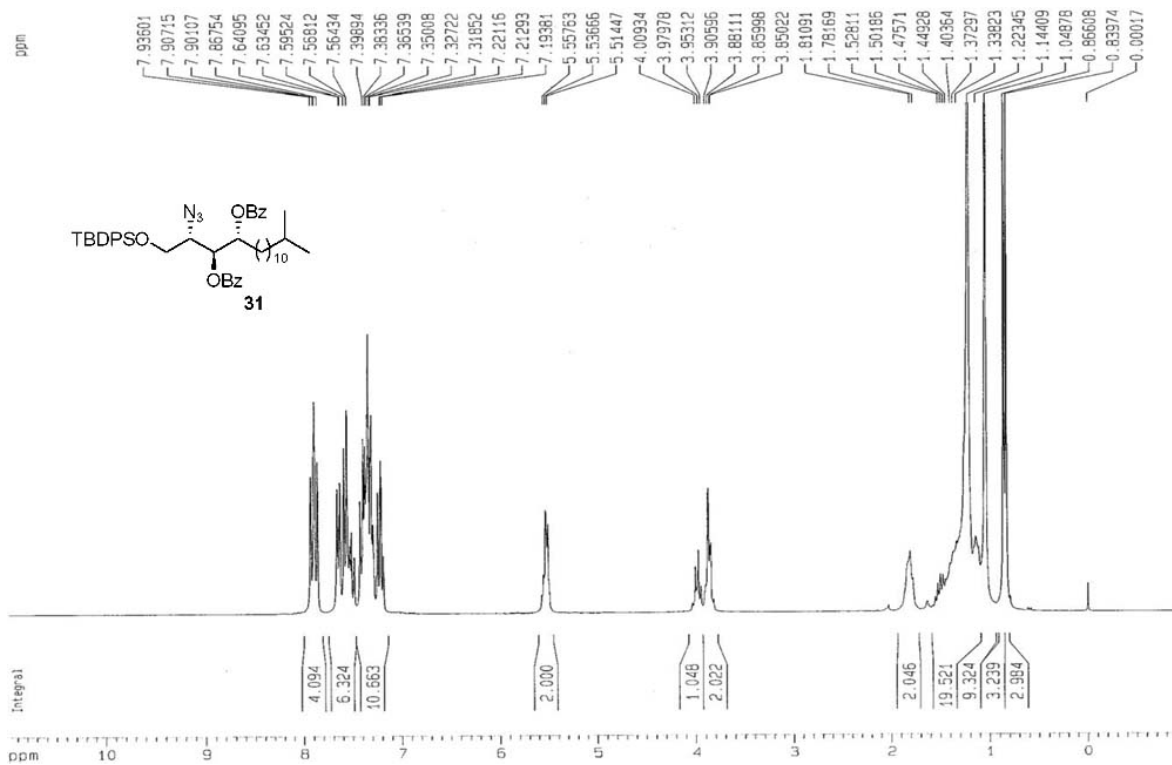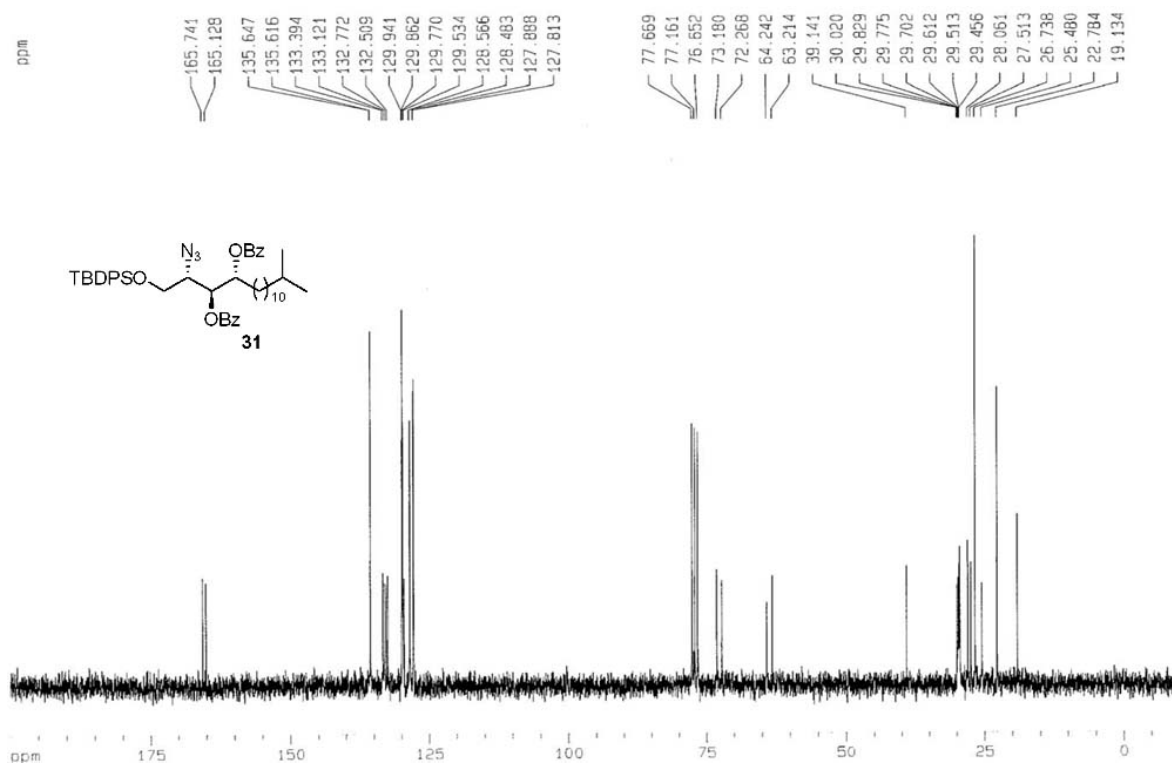

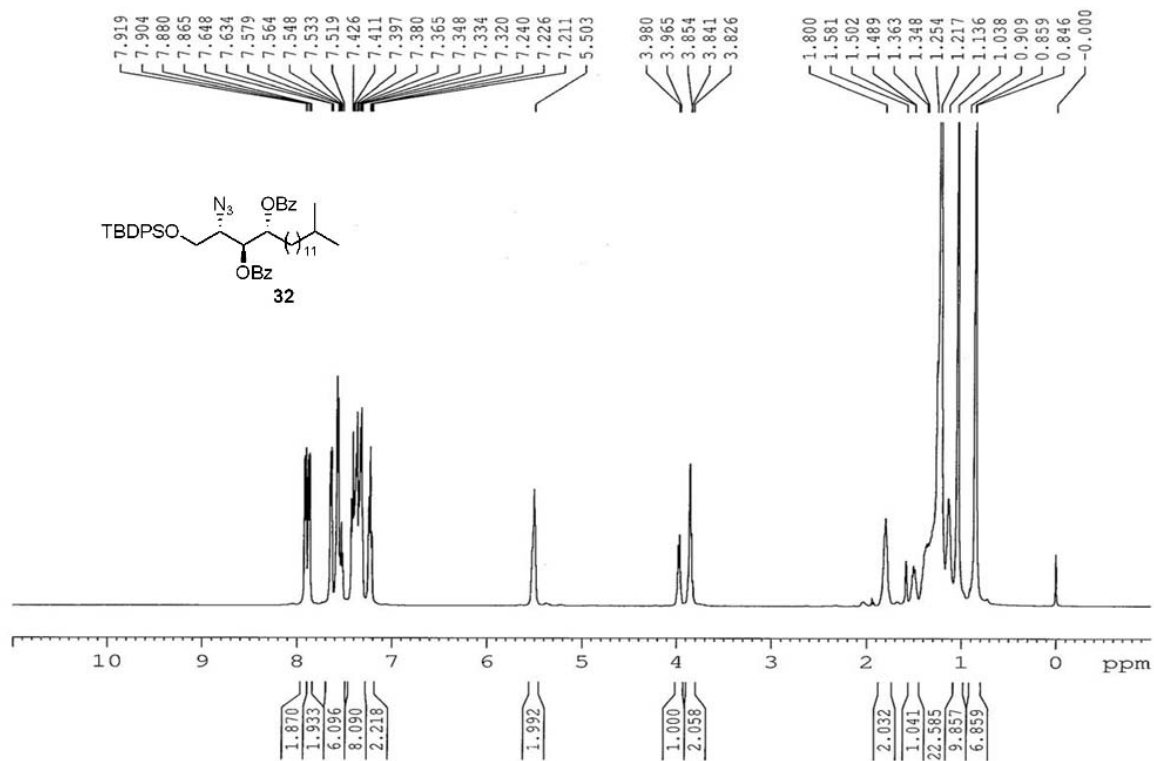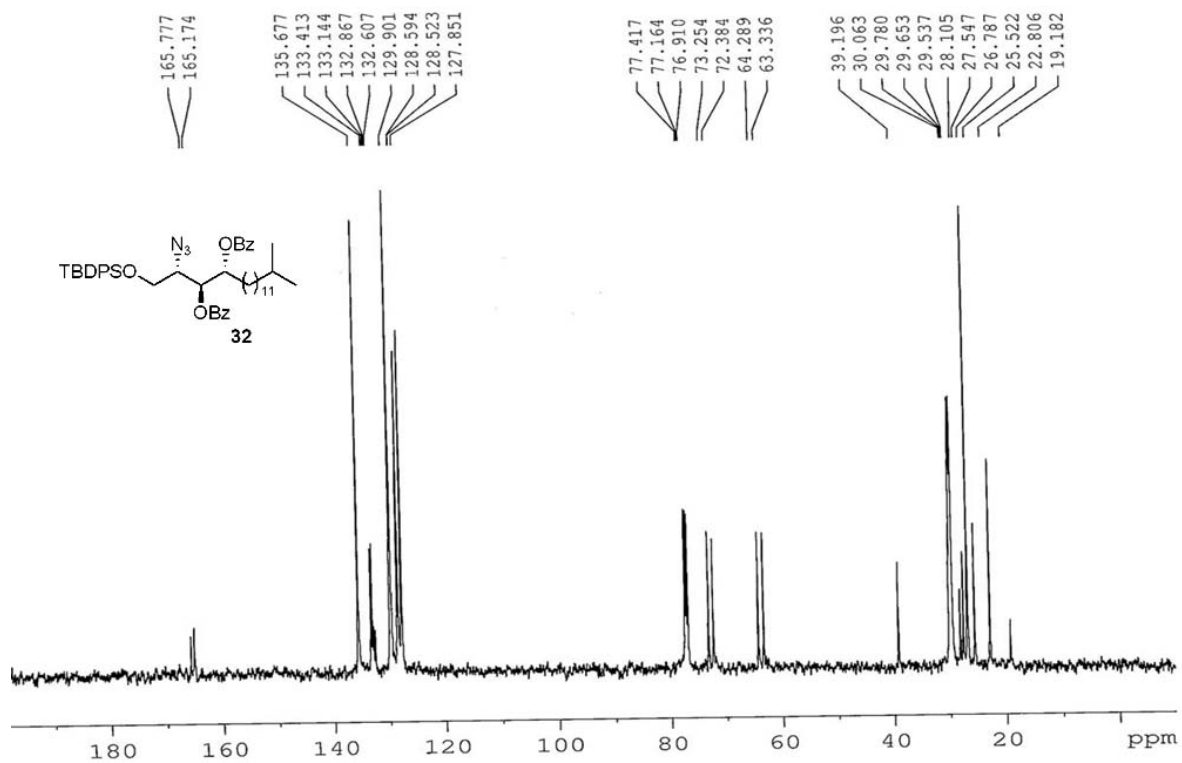

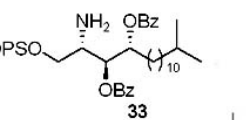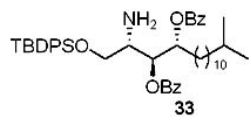

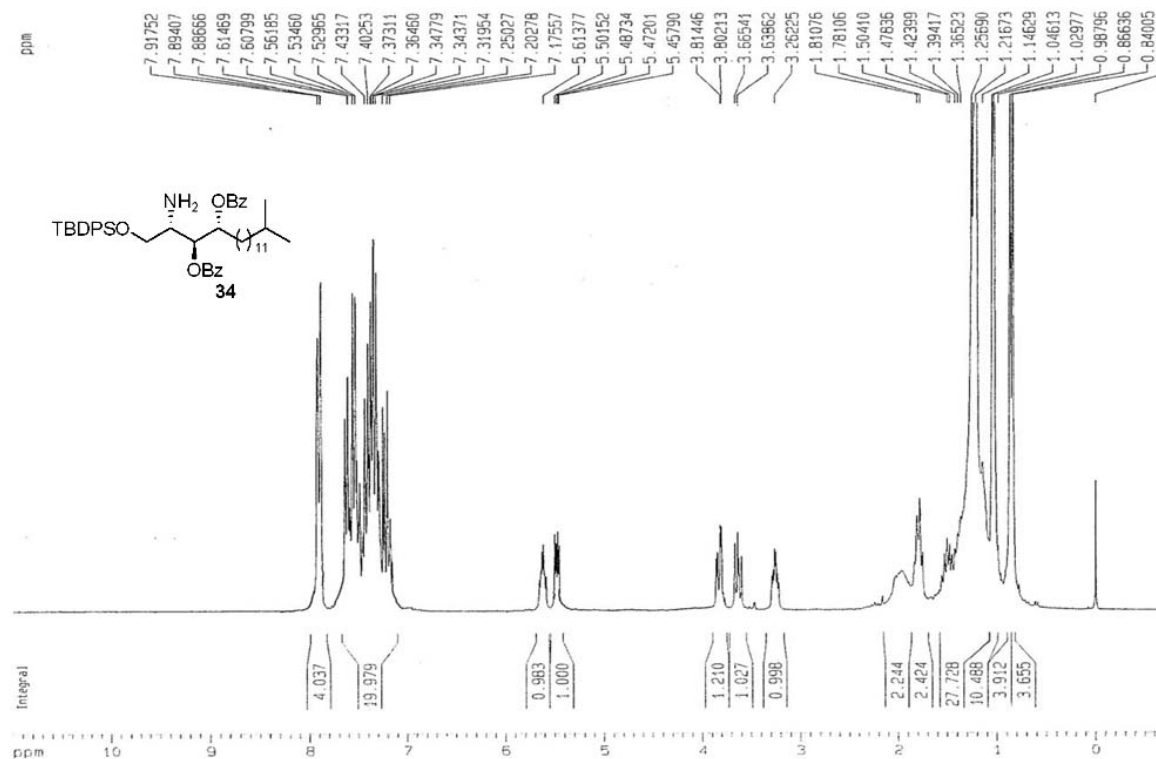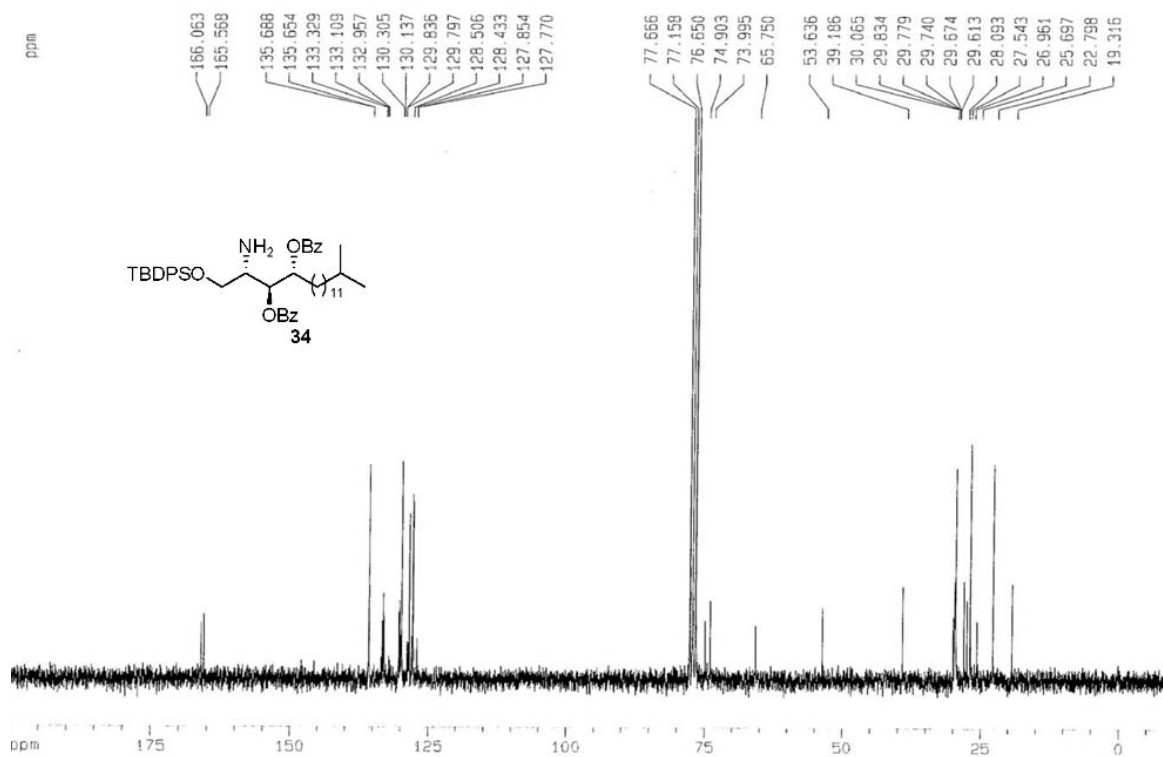

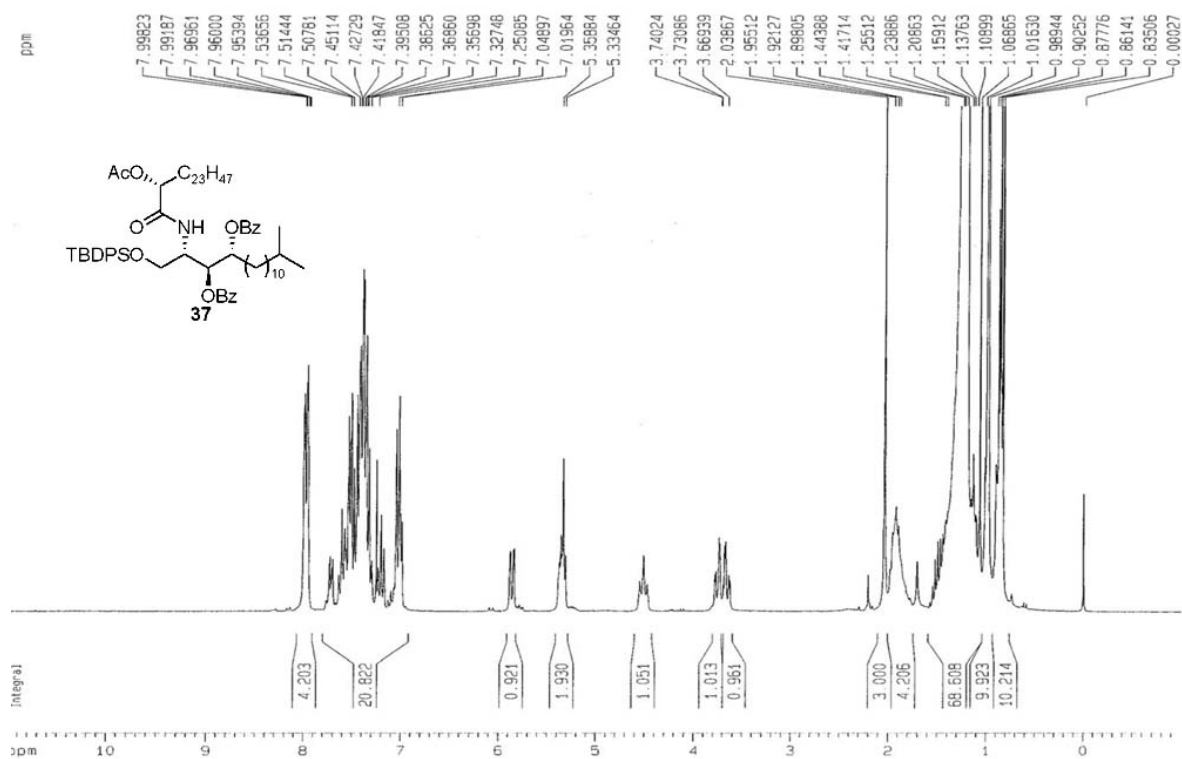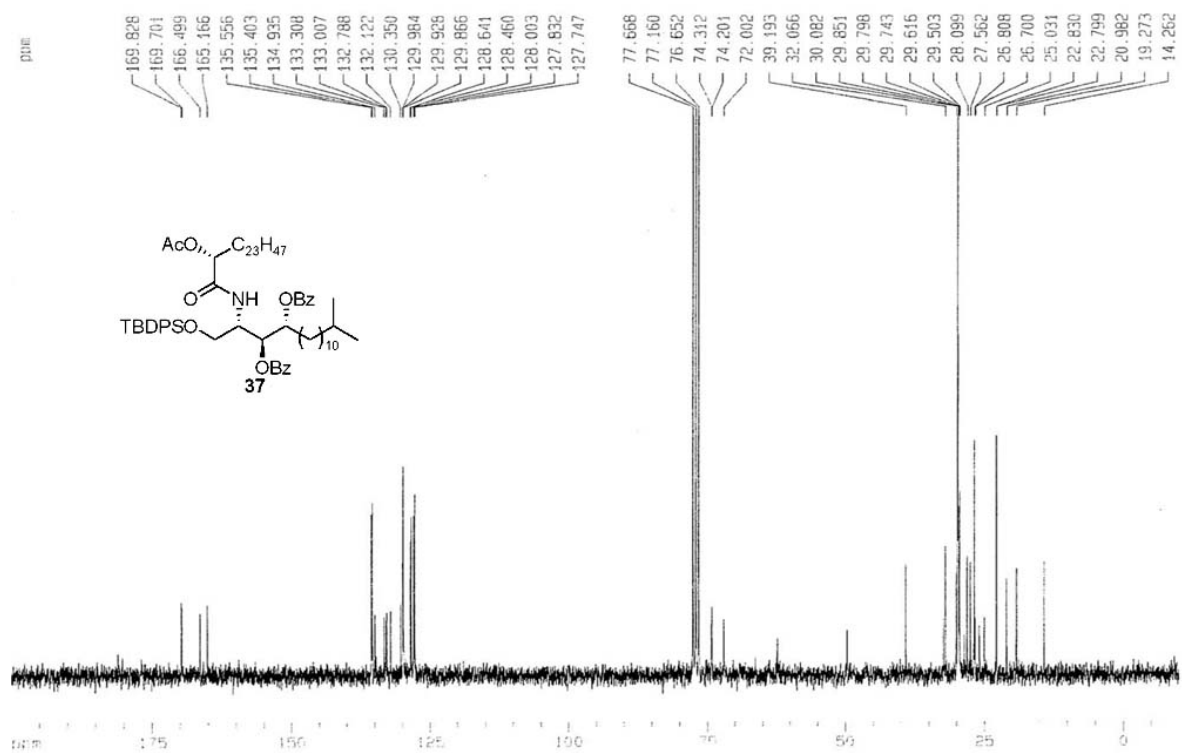



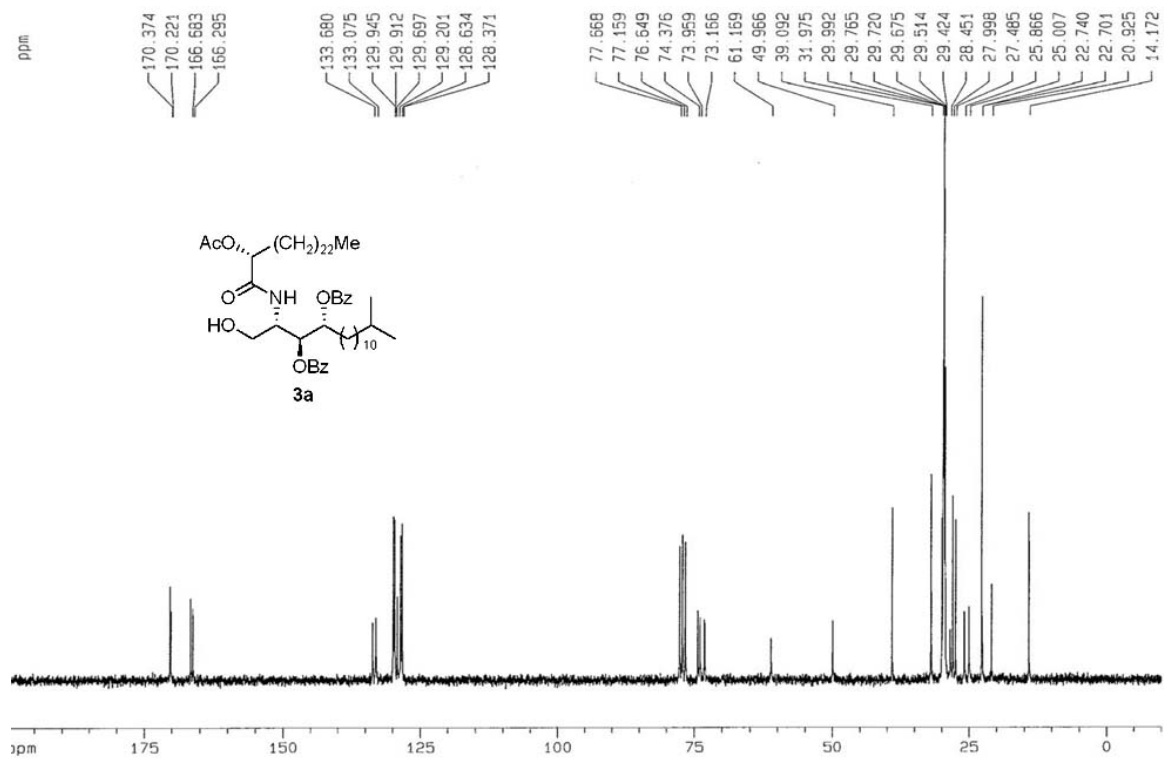

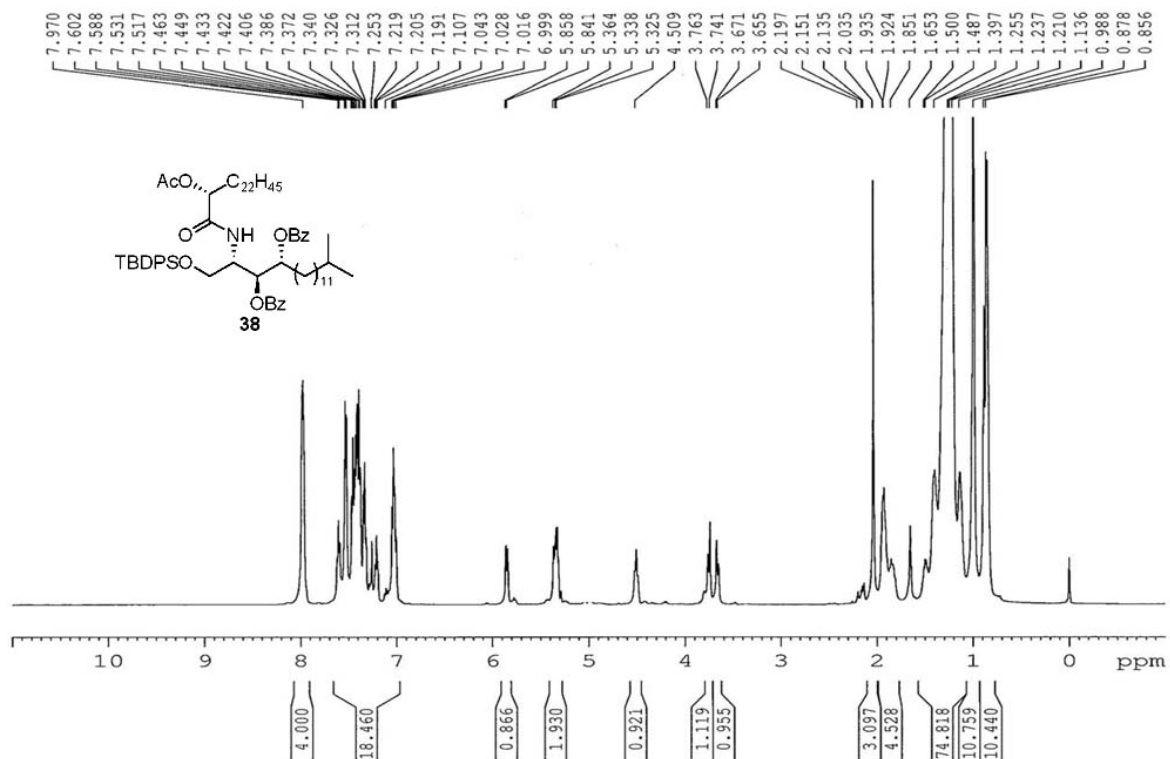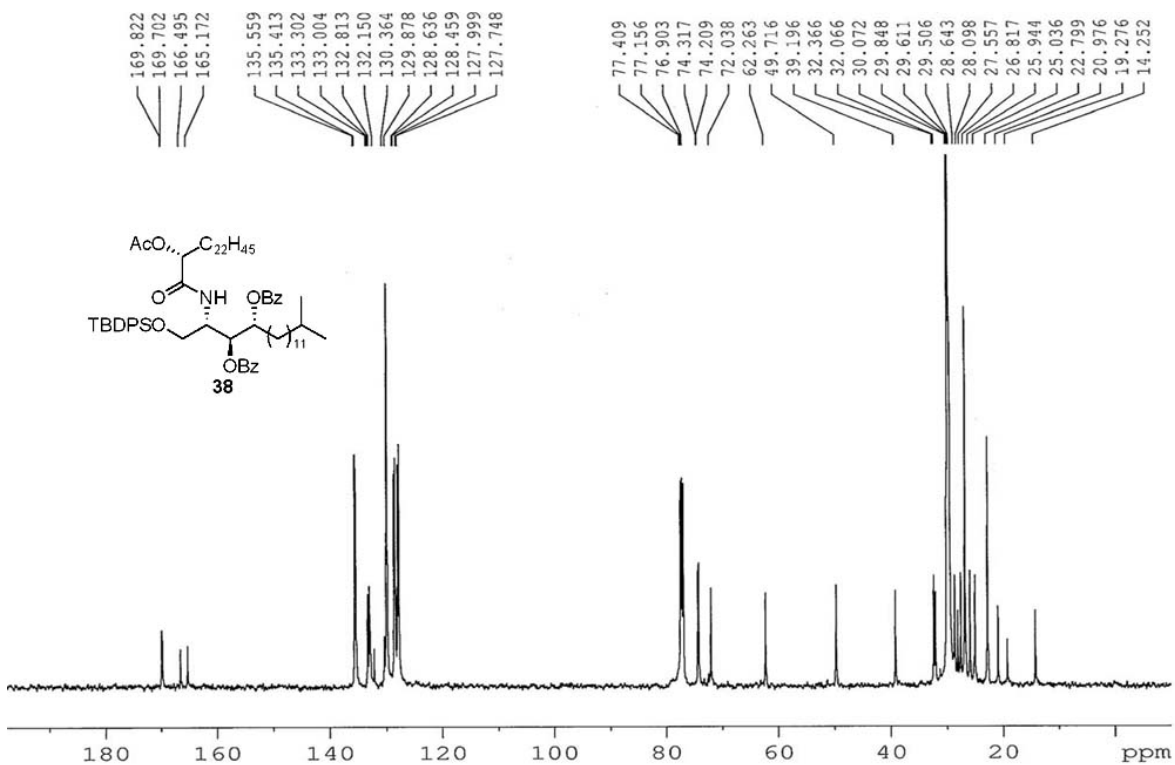

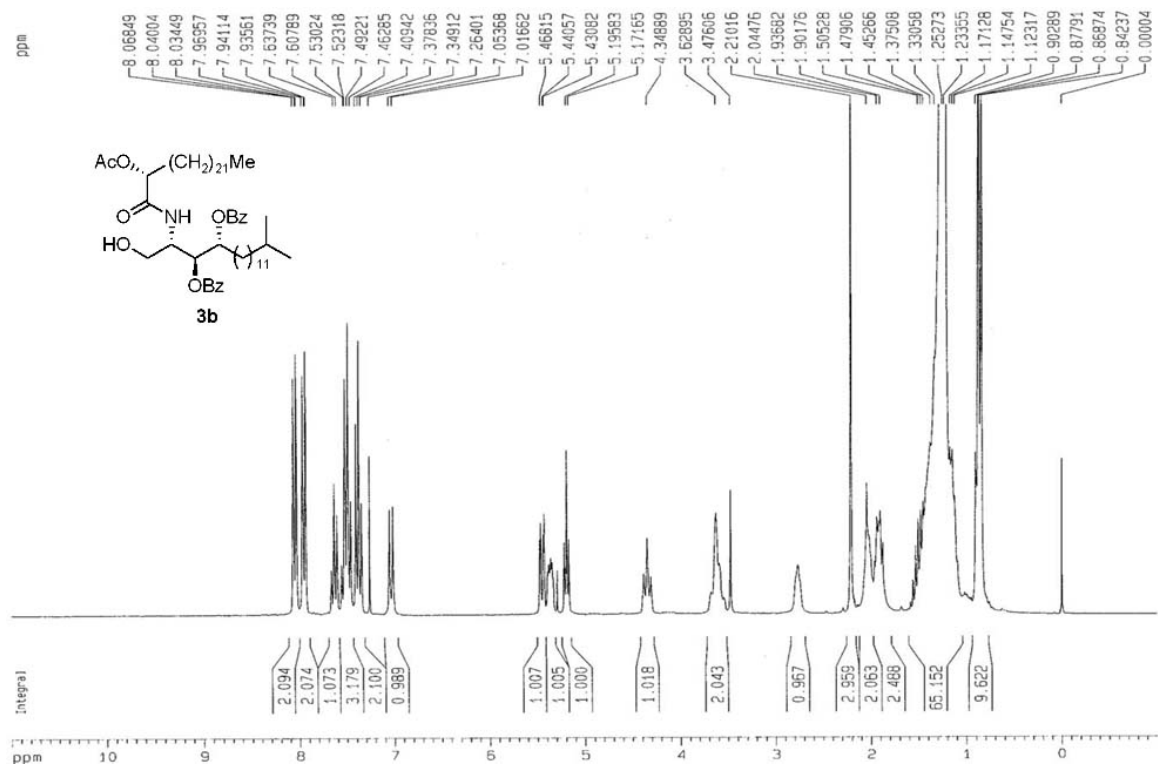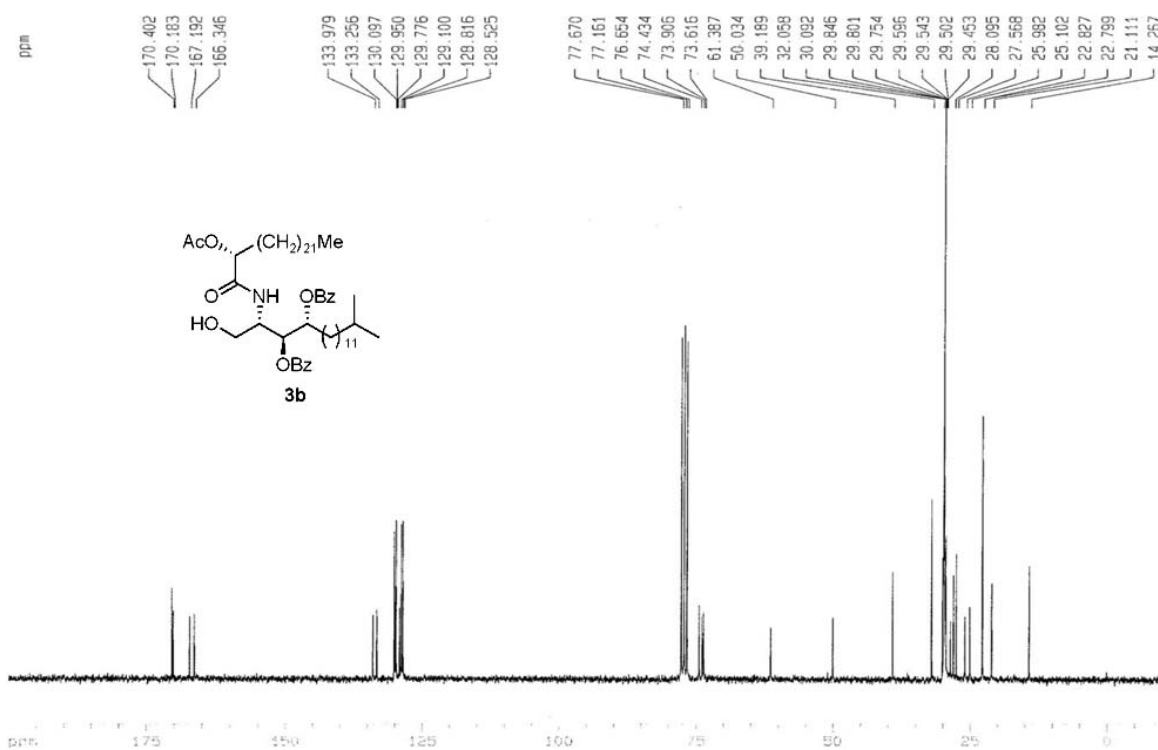

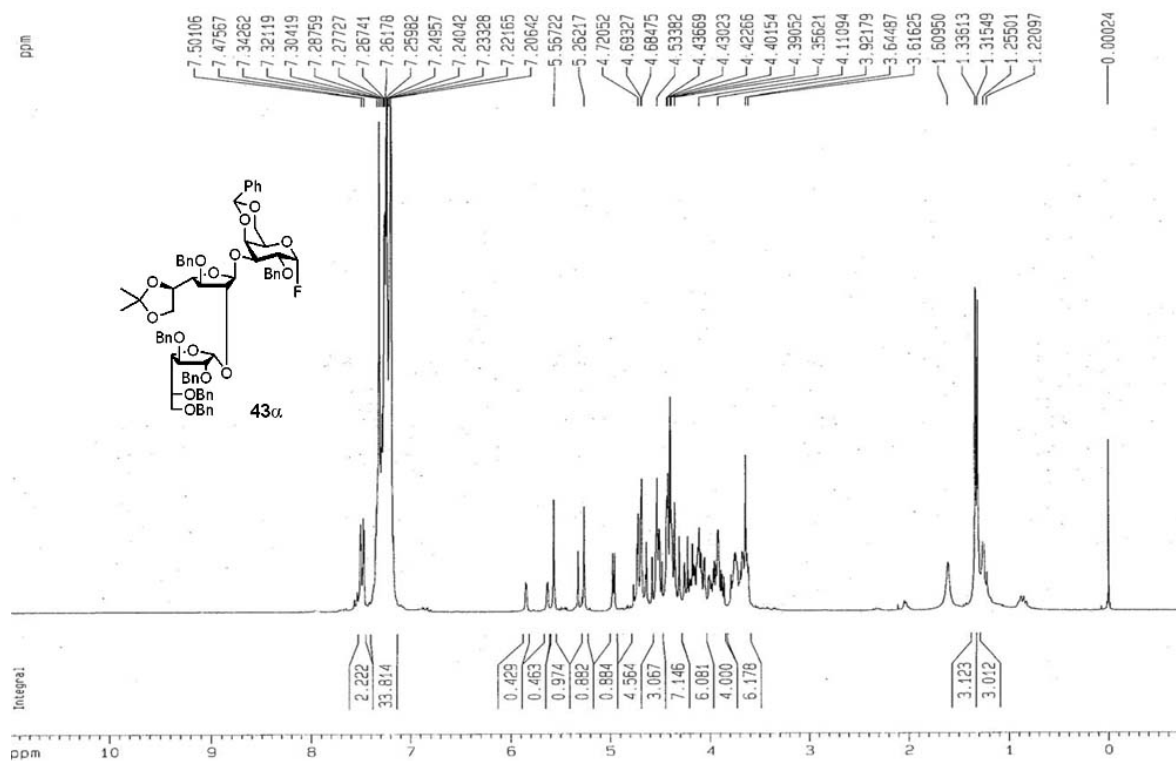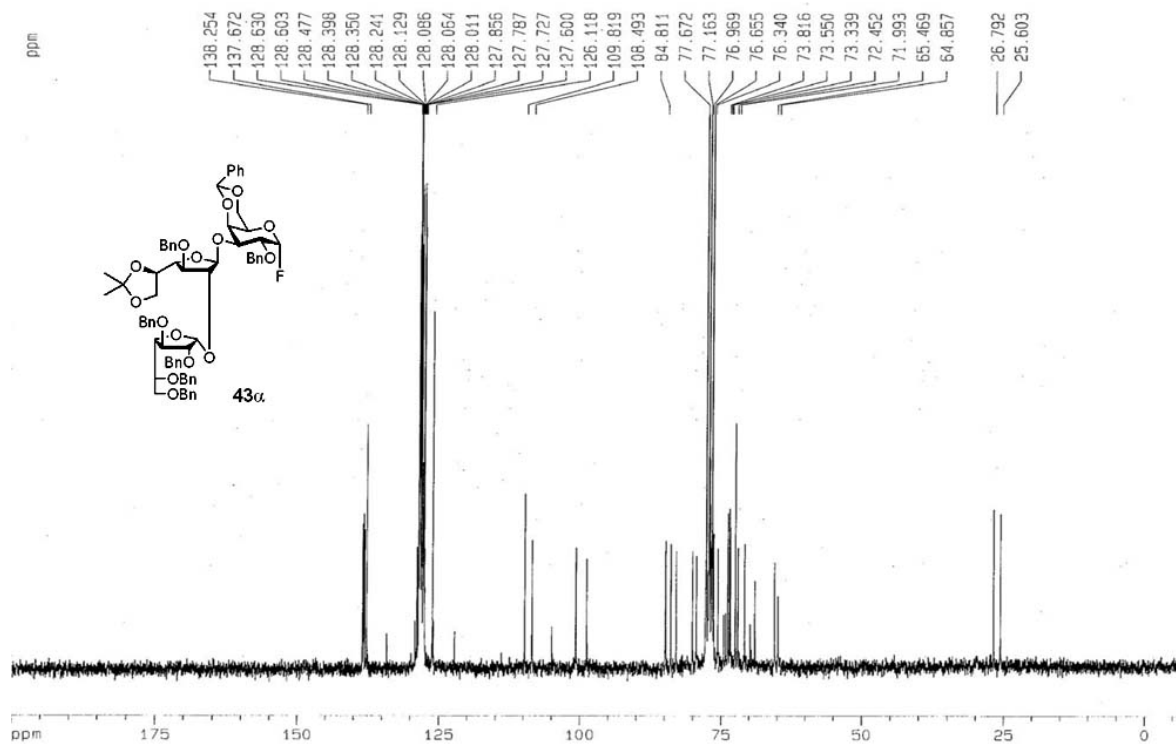

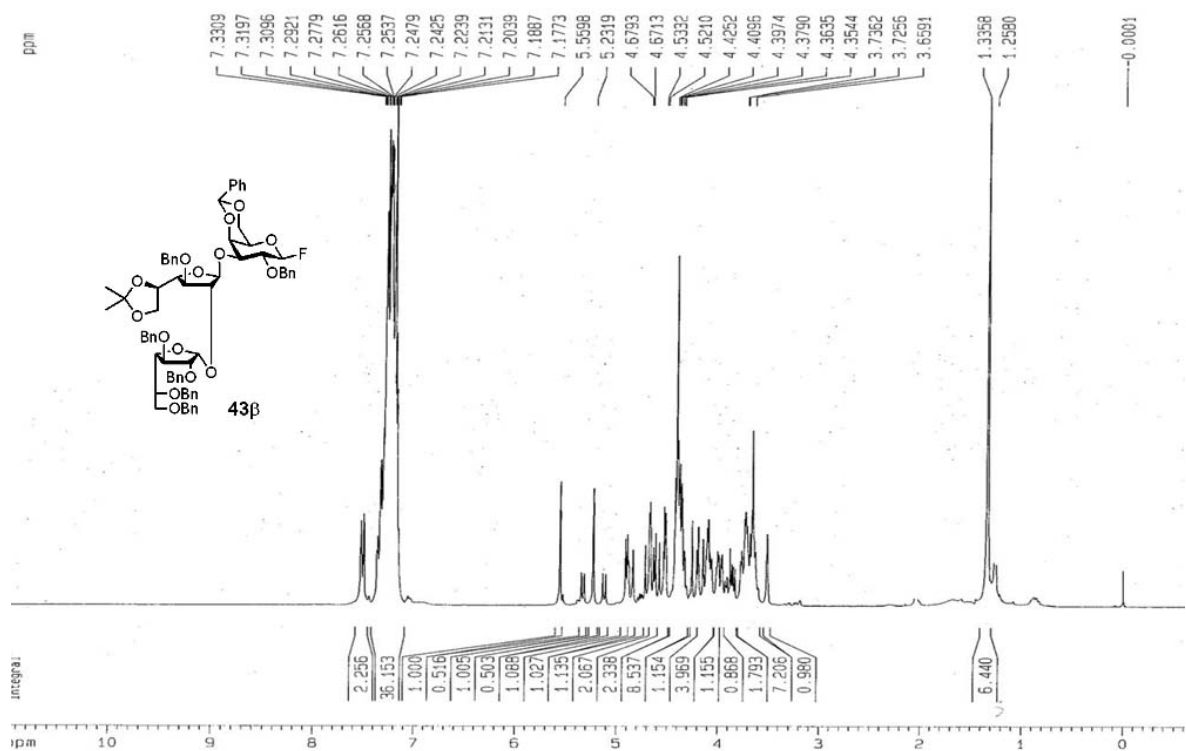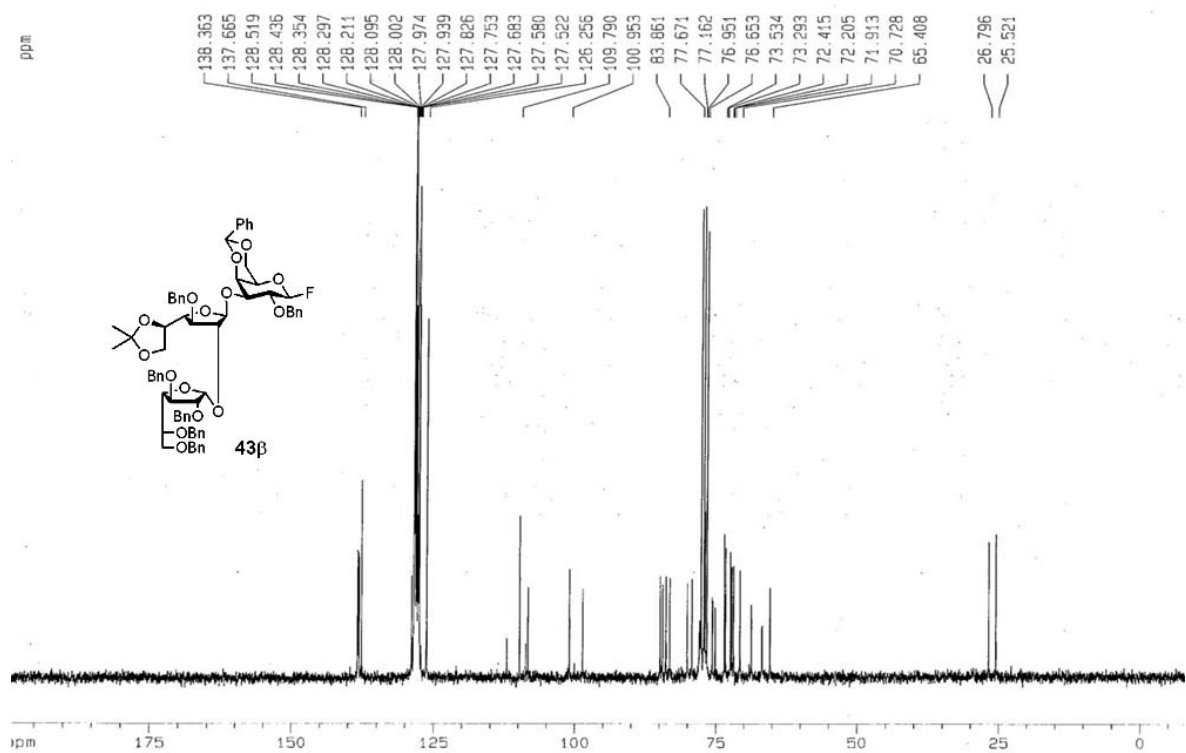

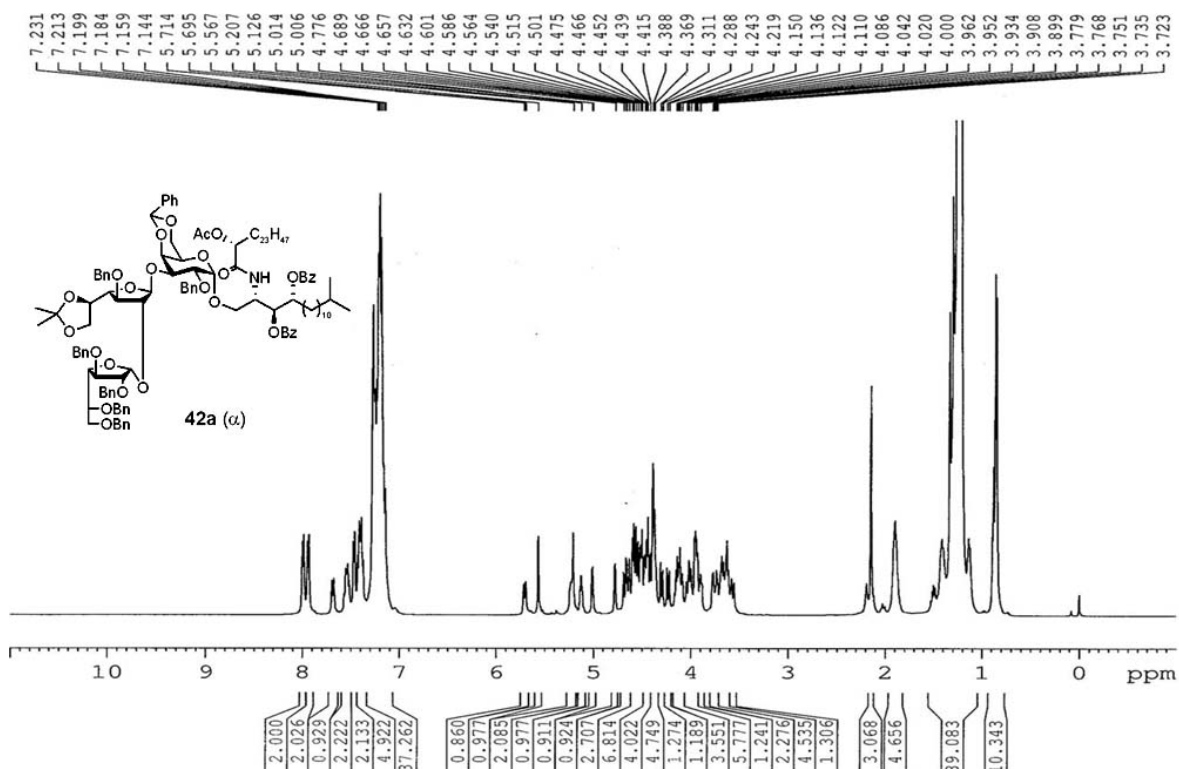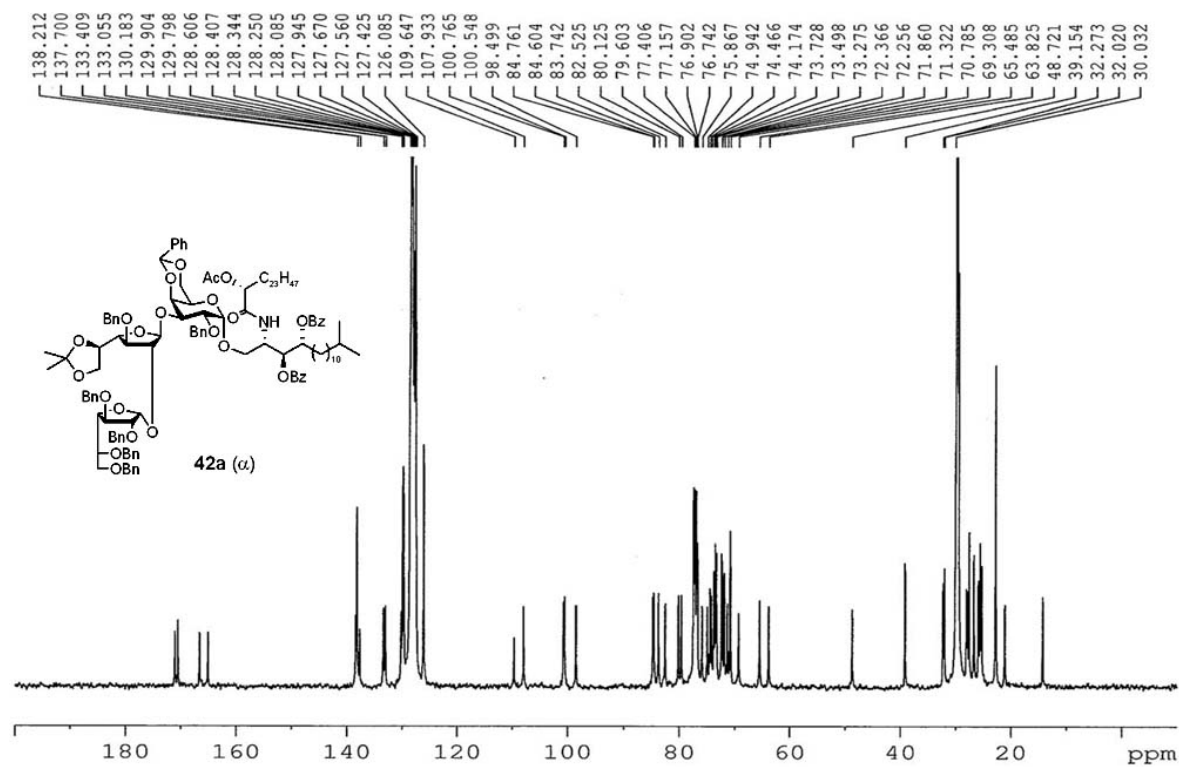



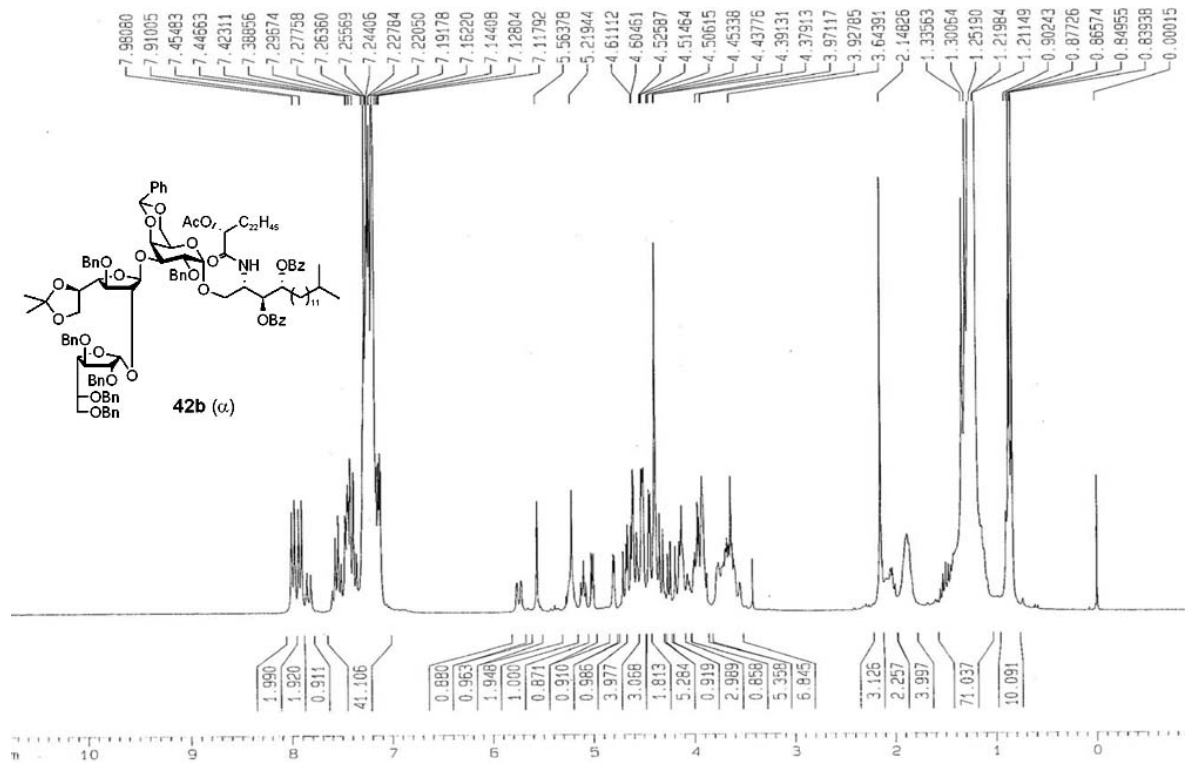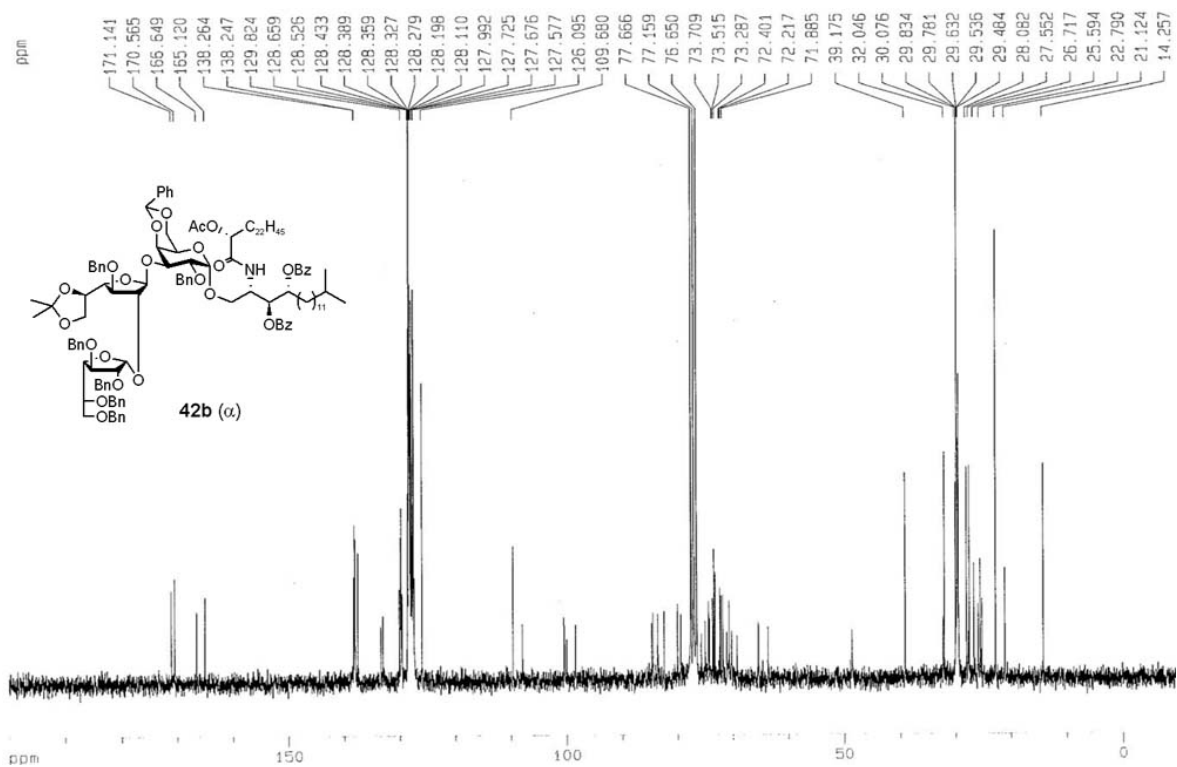



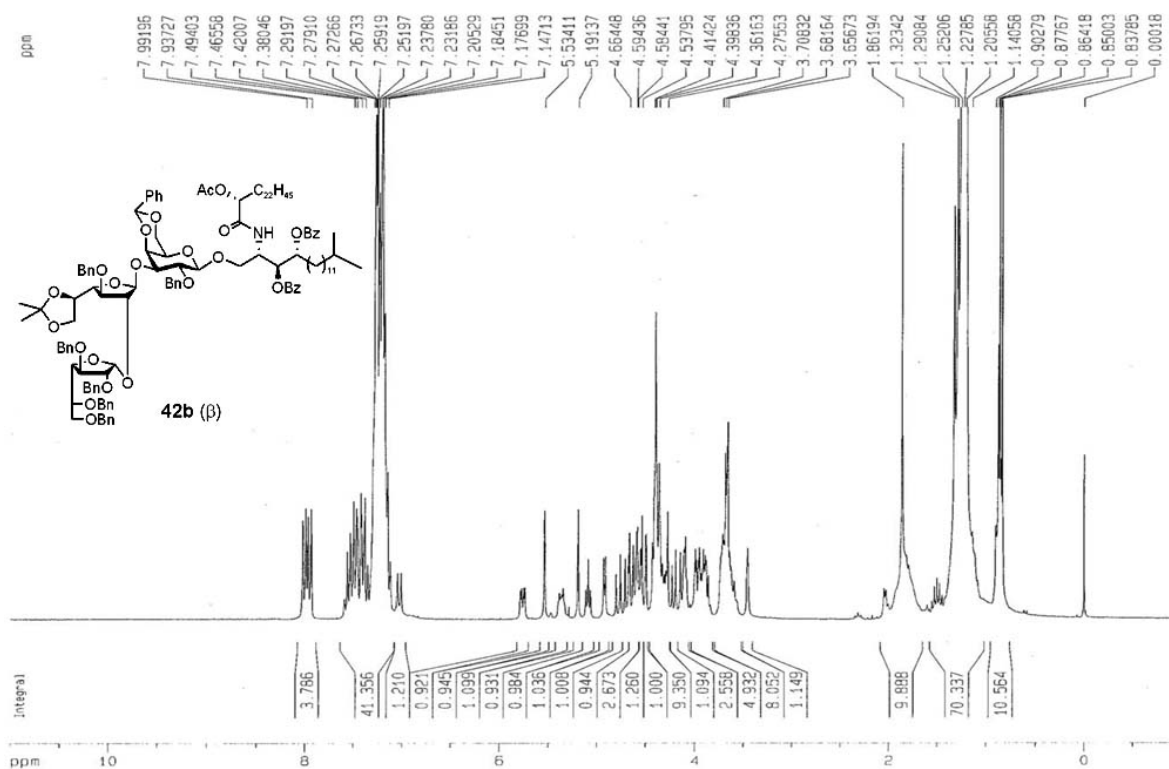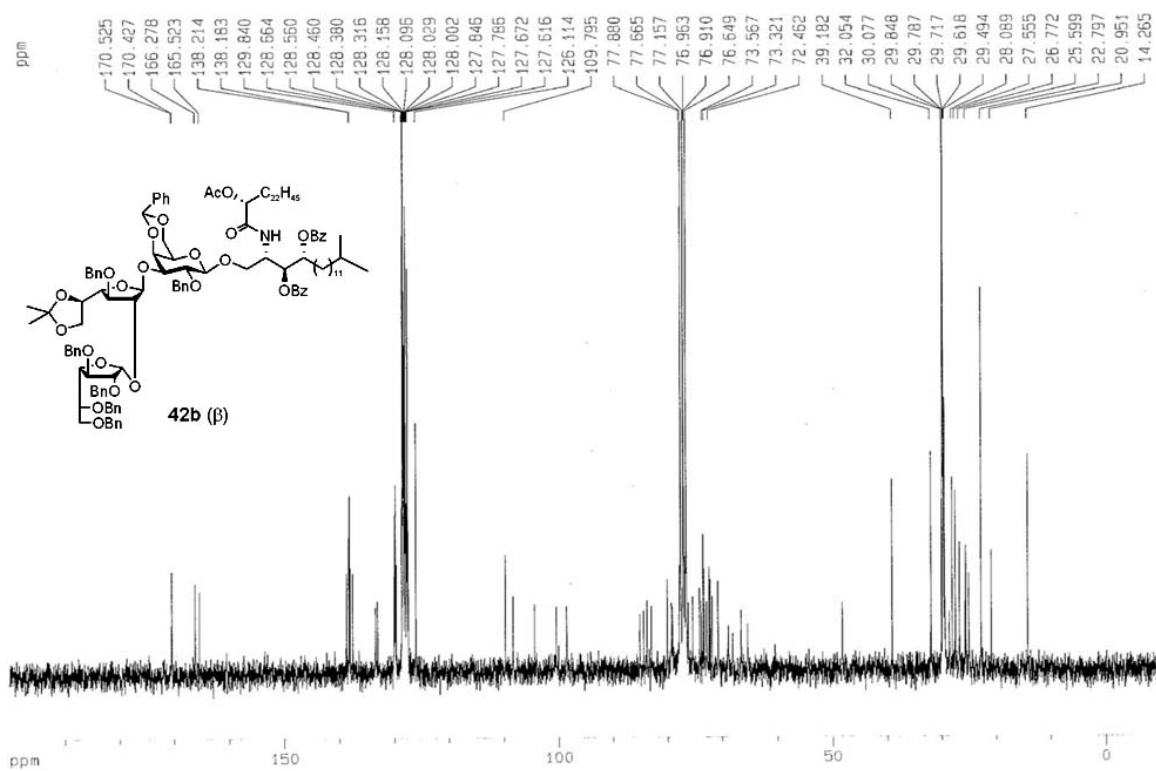

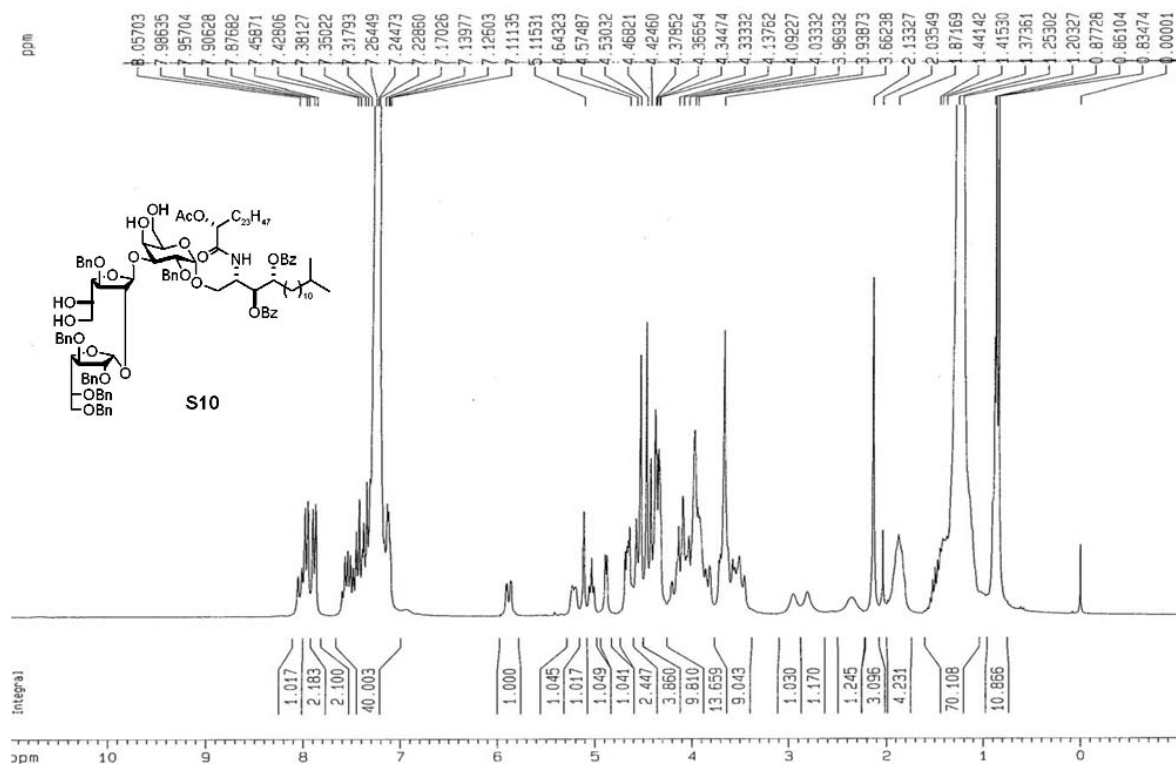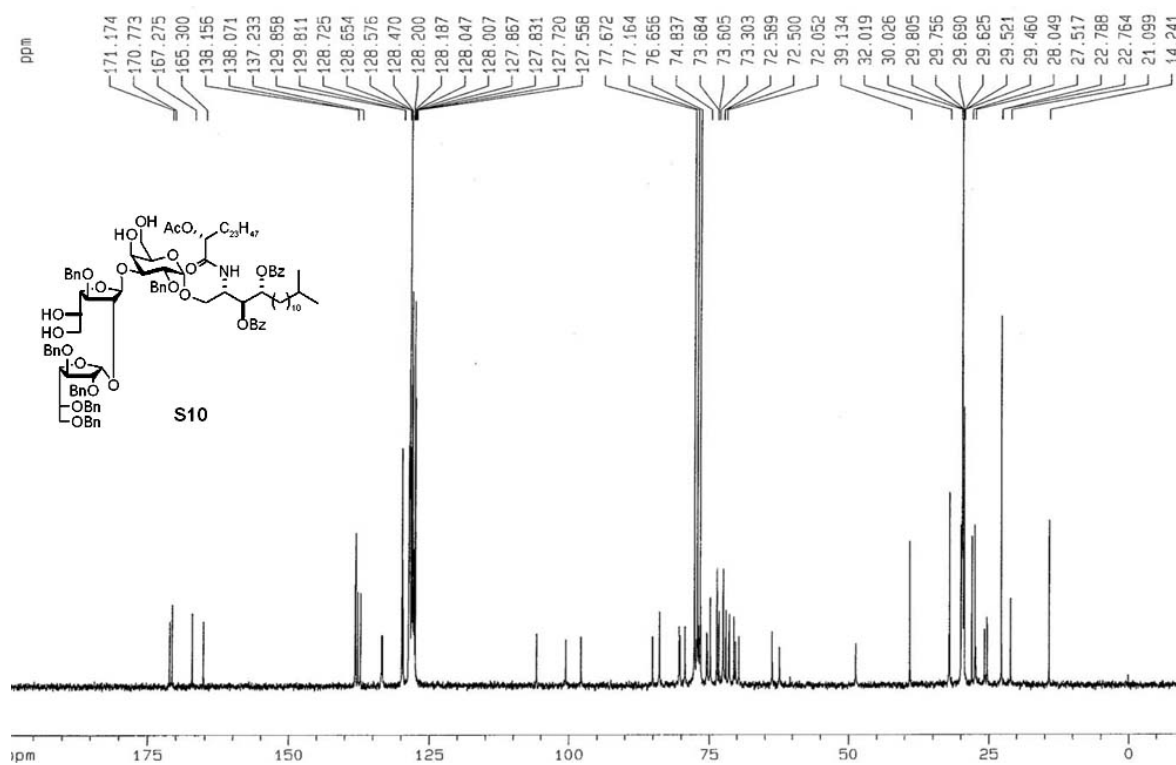

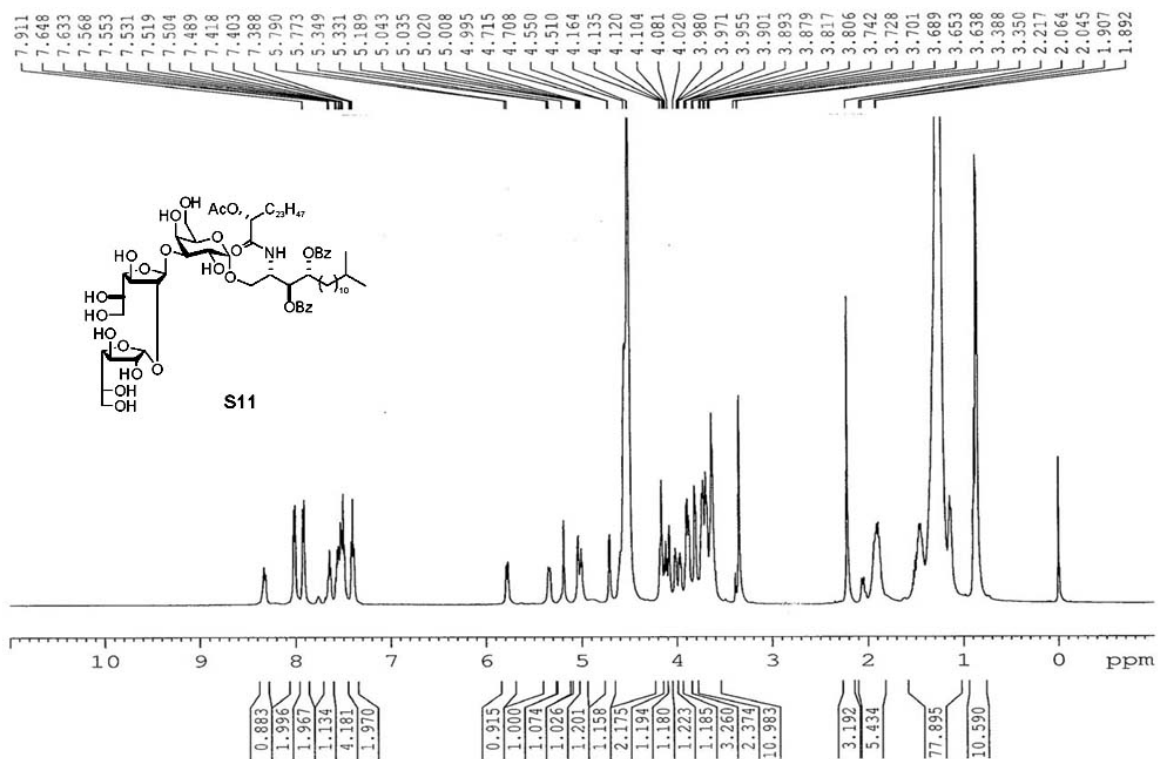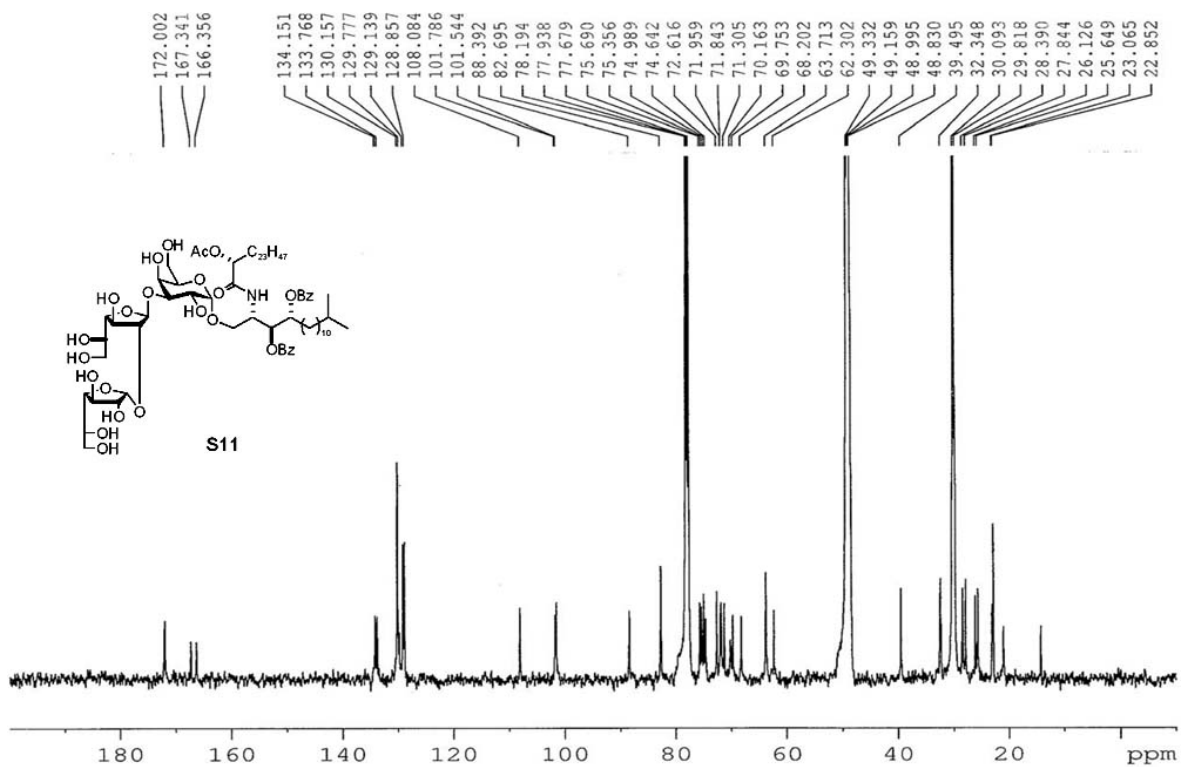



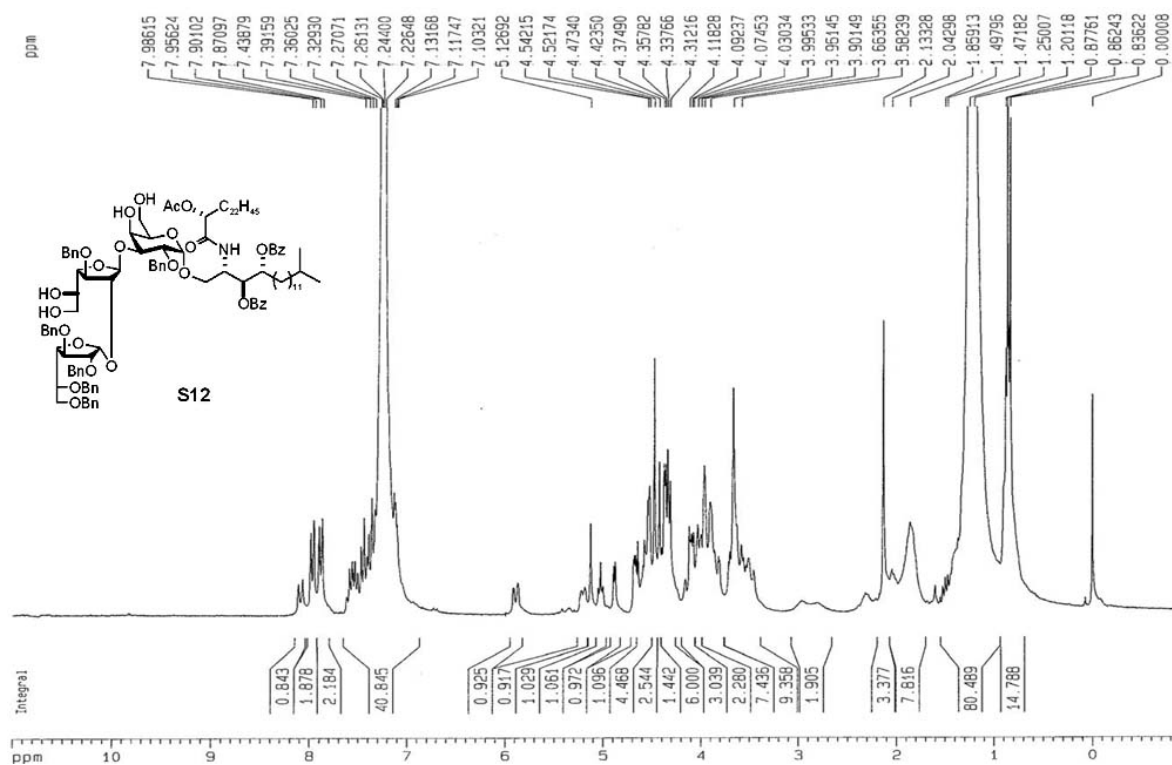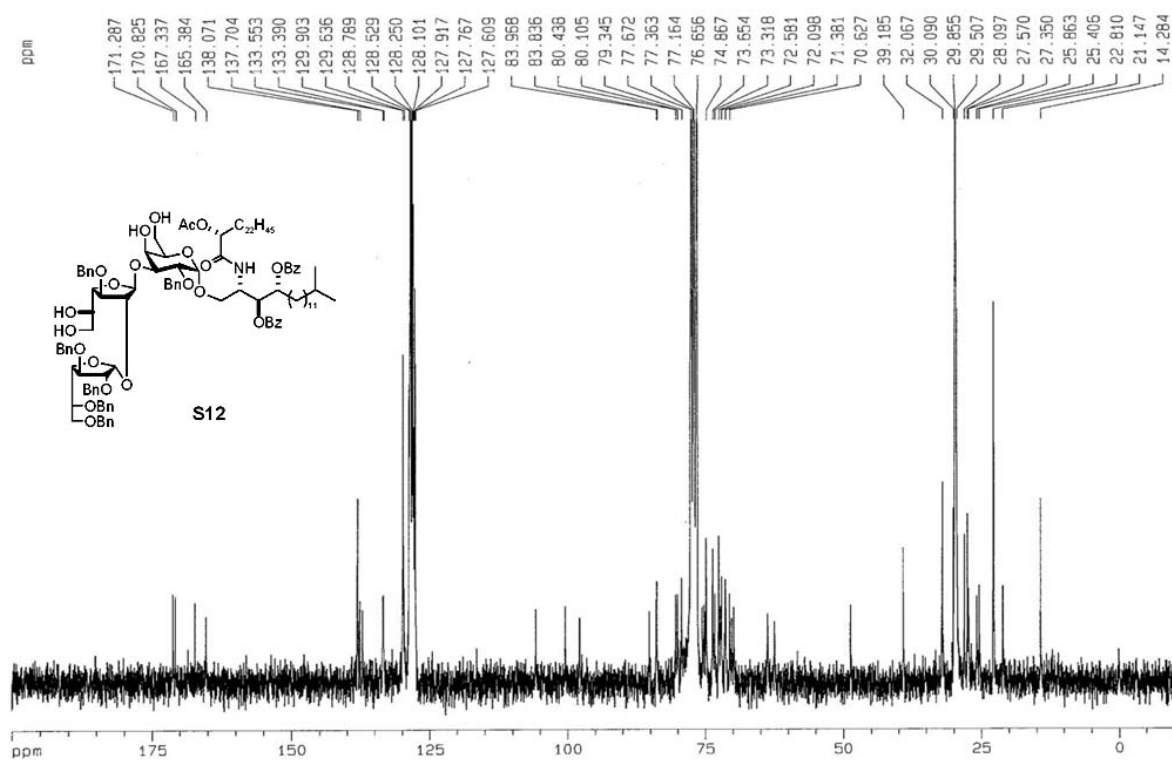

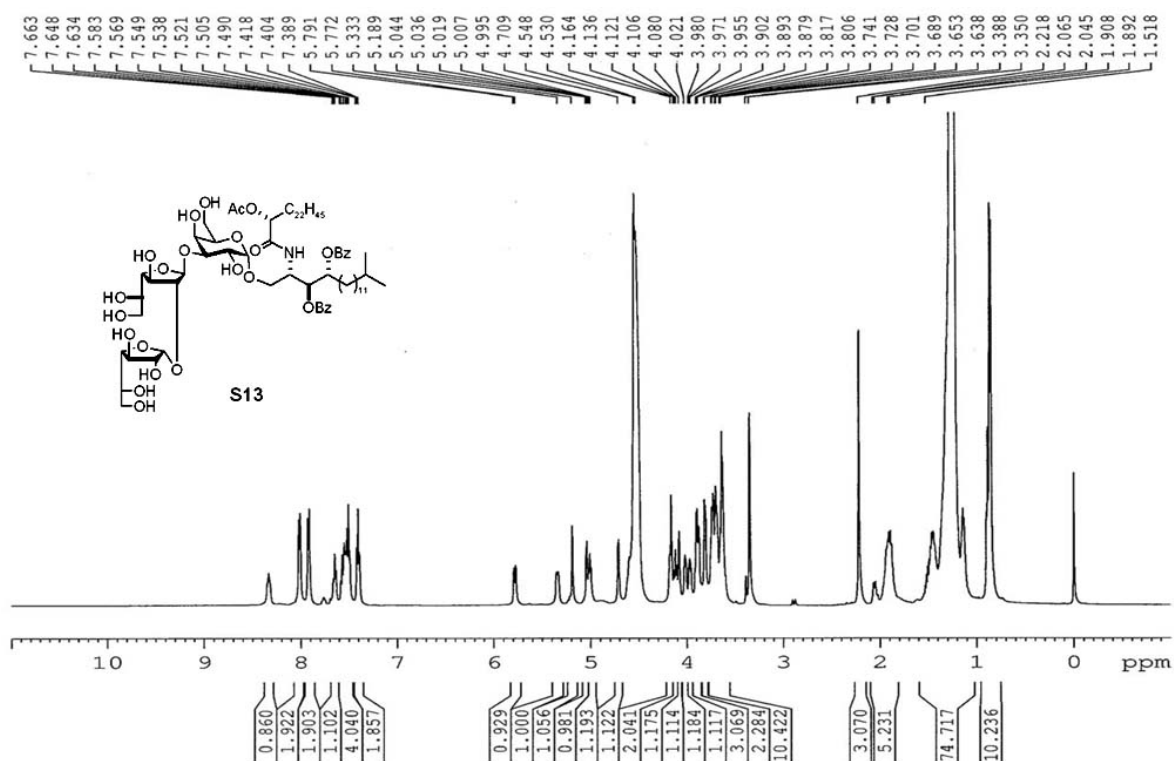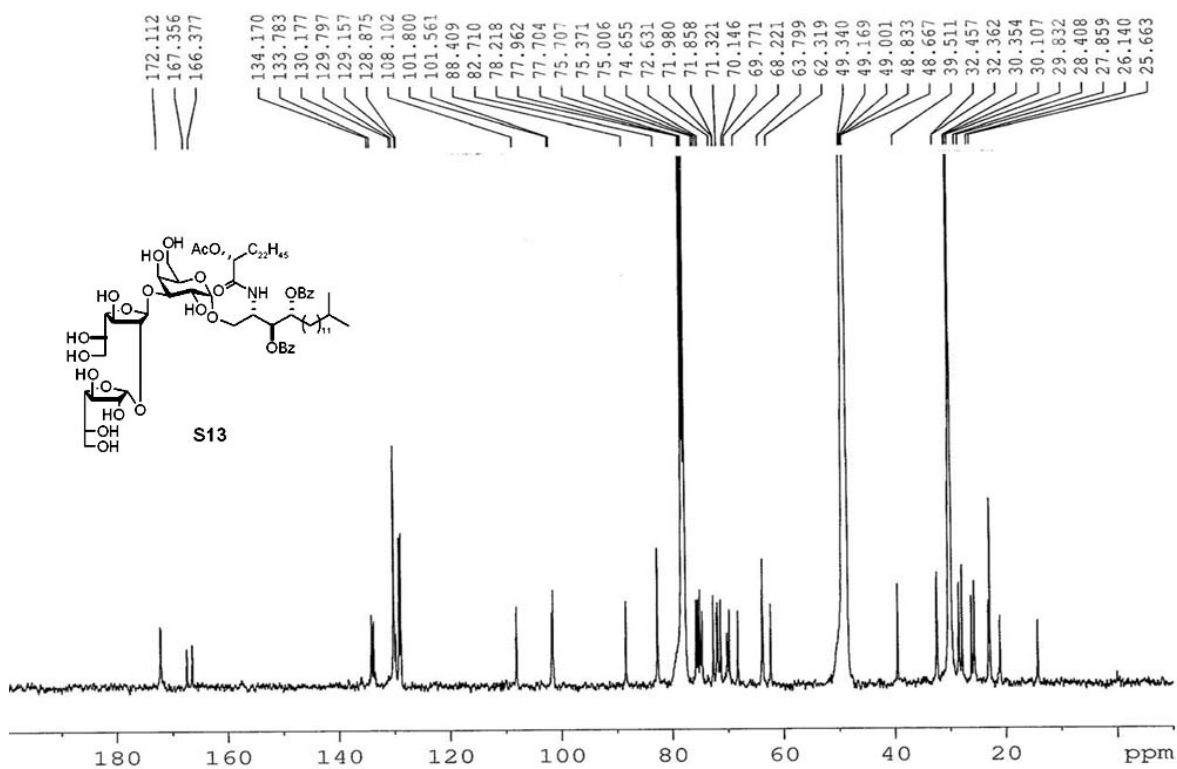

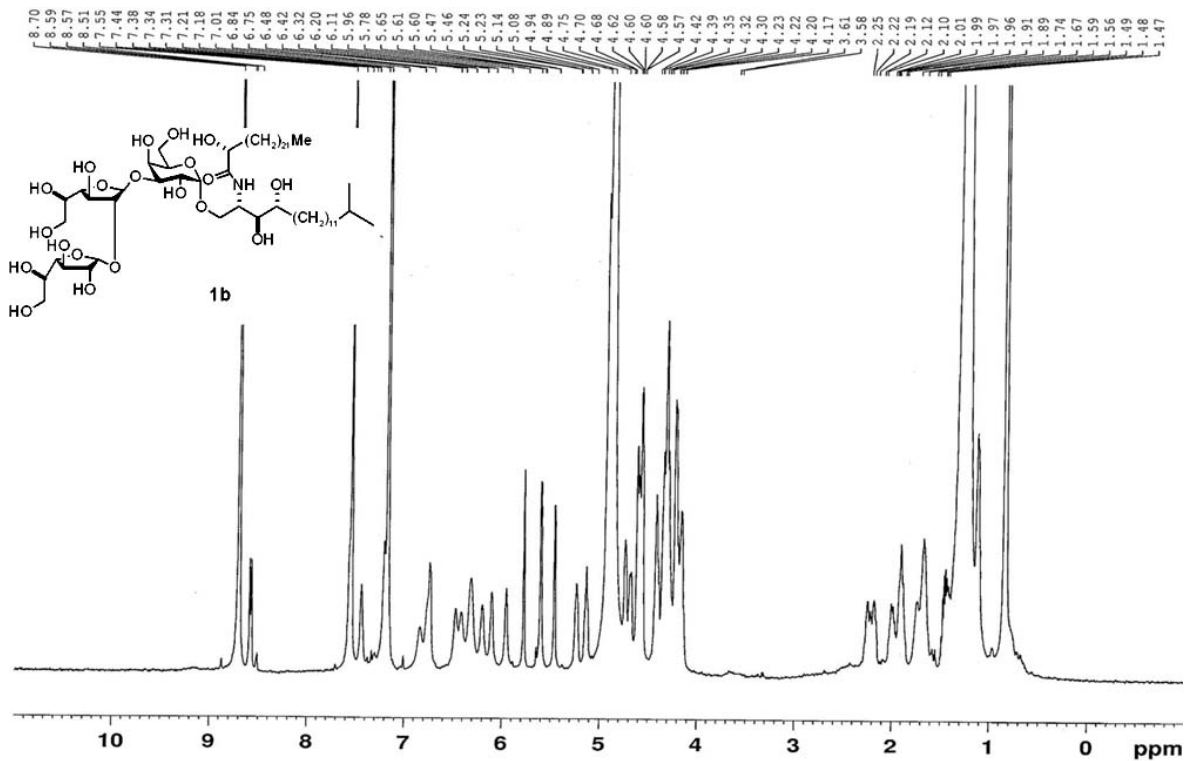

APT\_LYJ Agelagalastatin

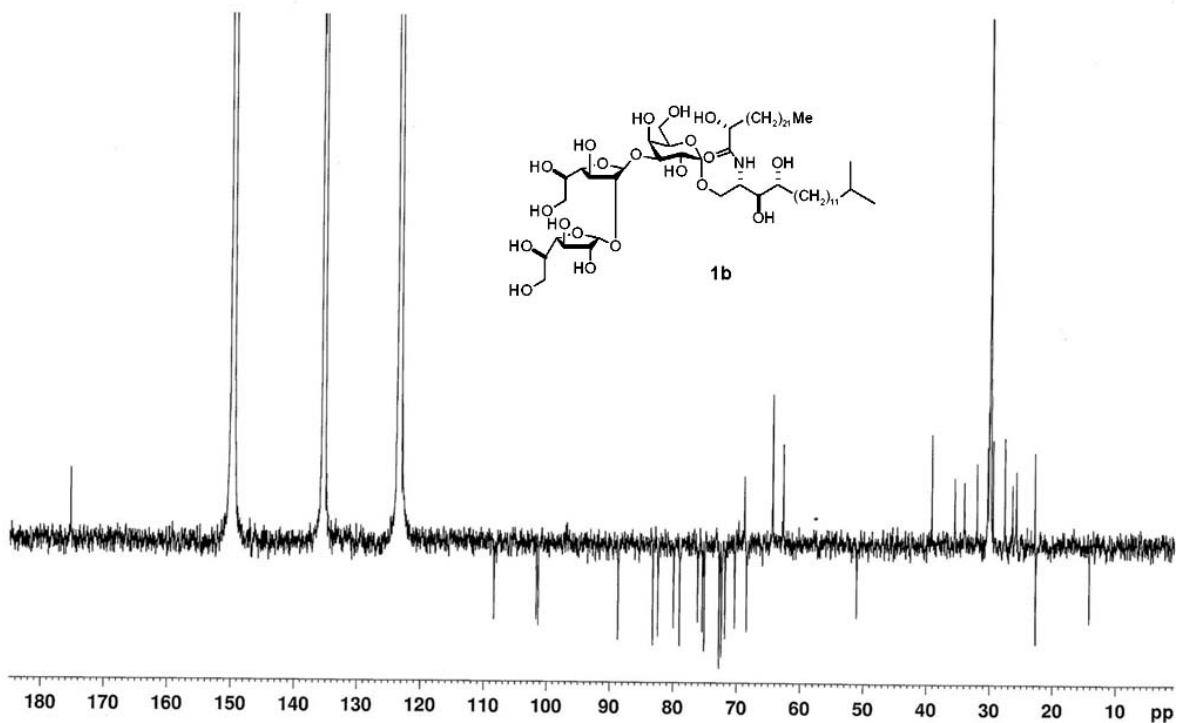

## $^1\text{H}$ and $^{13}\text{C}$ (APT) NMR Spectra of Natural and Synthetic Agelagalastatin

- Natural compound

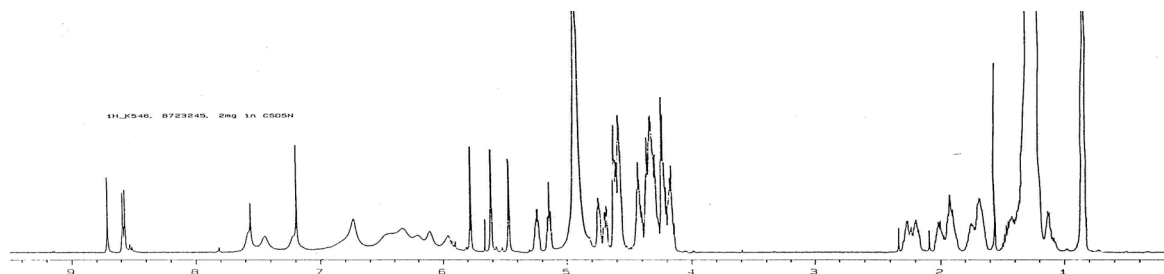

- Synthetic compound

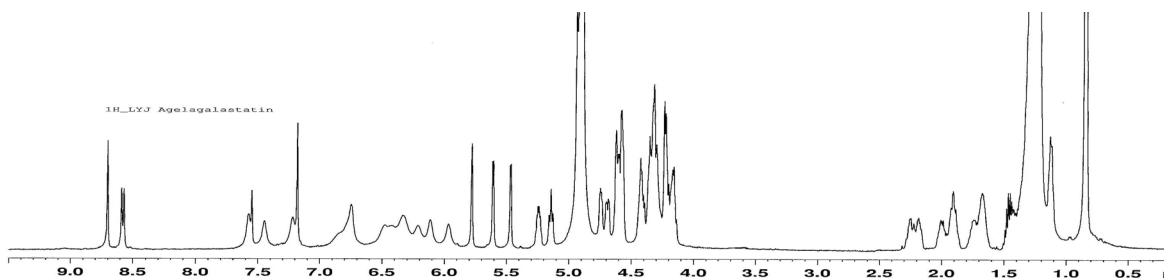

- Natural compound

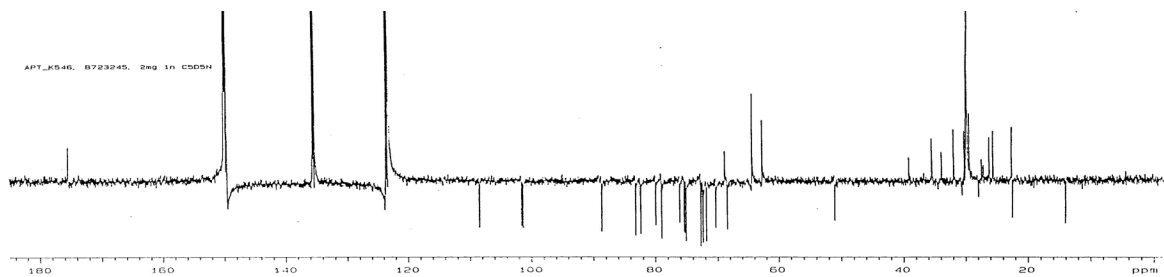

- Synthetic compound

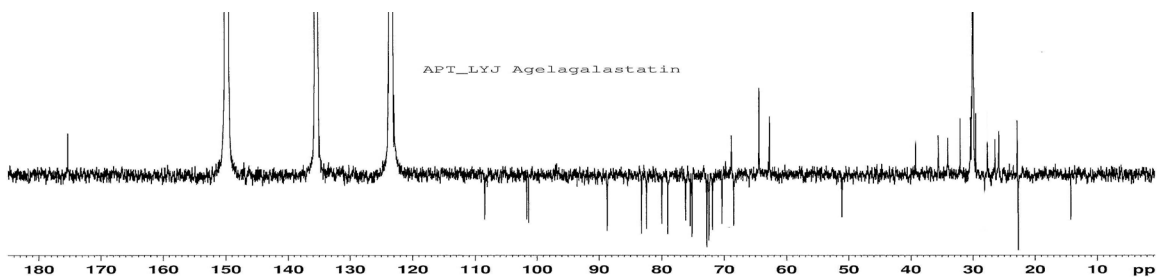

Supplement: Supplementary file 1 [file 4768147]
